# Supplementary material for: Implementing Computer-Based Psychotherapy Among Veterans in Outpatient Treatment for Substance Use Disorders
Source: Atypon-hosted journal article supplement (doi:10.1176/appi.ps.201400532), 2015-12-01

Figure for publication as supplementary data. Consort Diagram for Veterans Taking Part in a Feasibility Study of a Computer-Based Psychotherapy Intervention for Insomnia.

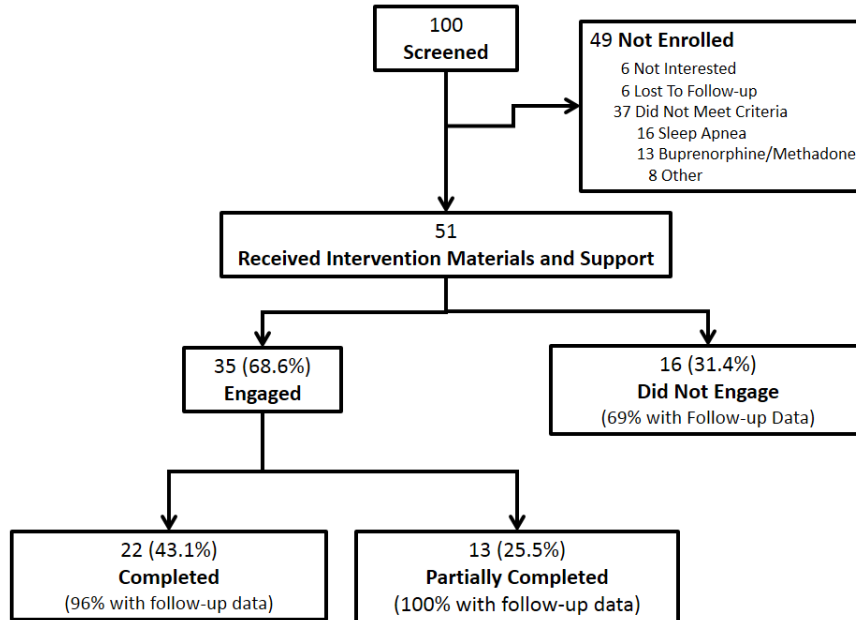

Supplement: appi.ps.201400532.ds001.pdf [file appi.ps.201400532.ds001.pdf]
